# Supplementary material for: Hyphal-Mediated Nitrogen translocation is Optimized at Intermediate N Levels in Pinus massoniana from 15N Tracing
Source: Research Square preprint supplement (doi:10.21203/rs.3.rs-7910916/v1), 2025-11-04
Supplement: Supplementary file 1 [file bcd875a82a394a15ba56b8ec.docx]

**Supplementary Materials (Tables):**


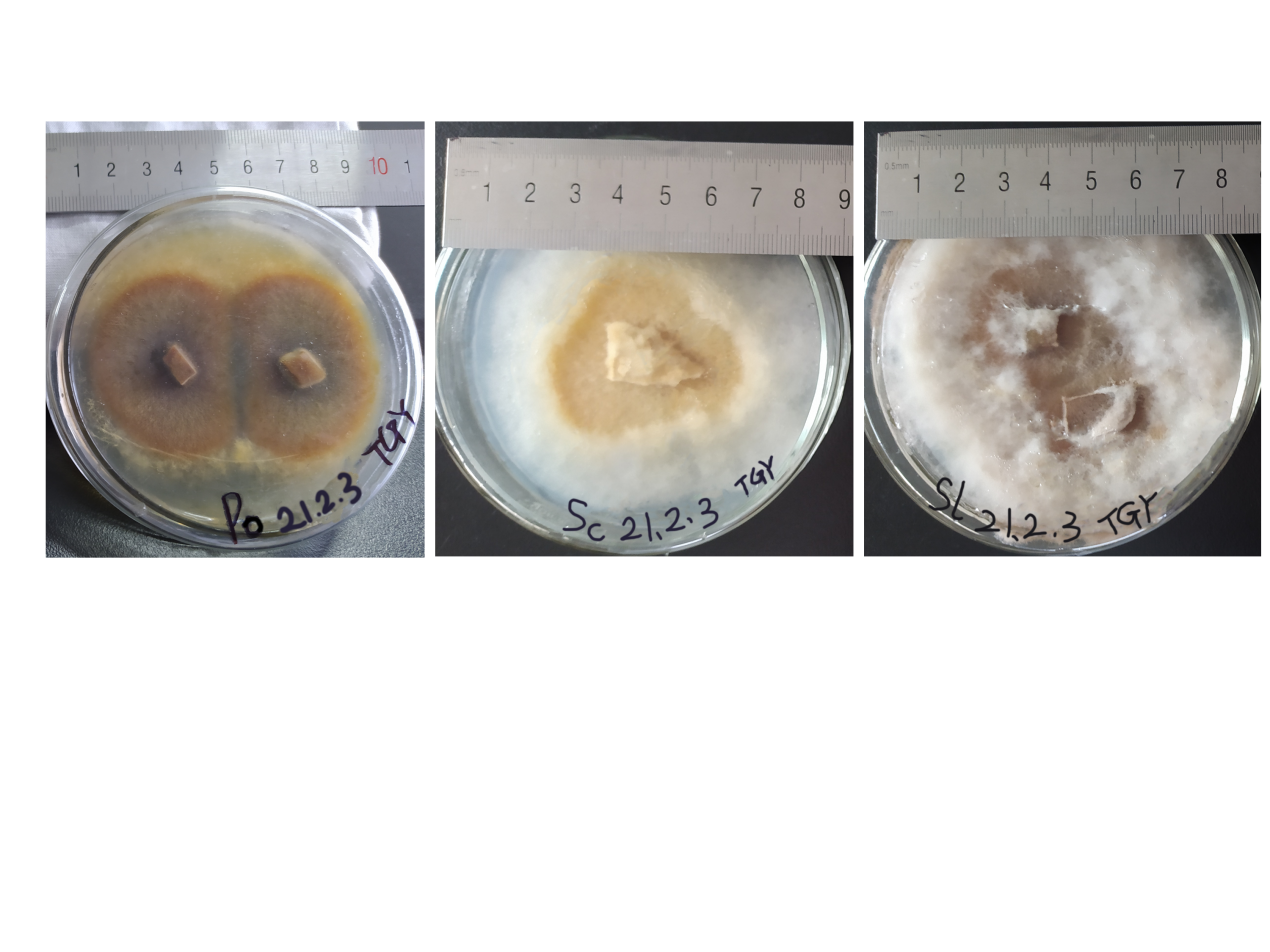


**Fig. S1** This is a diagram of the growth status of the three strains used in this experiment in a flat solid petri dish, from left to right *Pisolithus orientalis* (Po), *Scleroderma citrinum* (Sc), *Suillus luteus* (Sl).


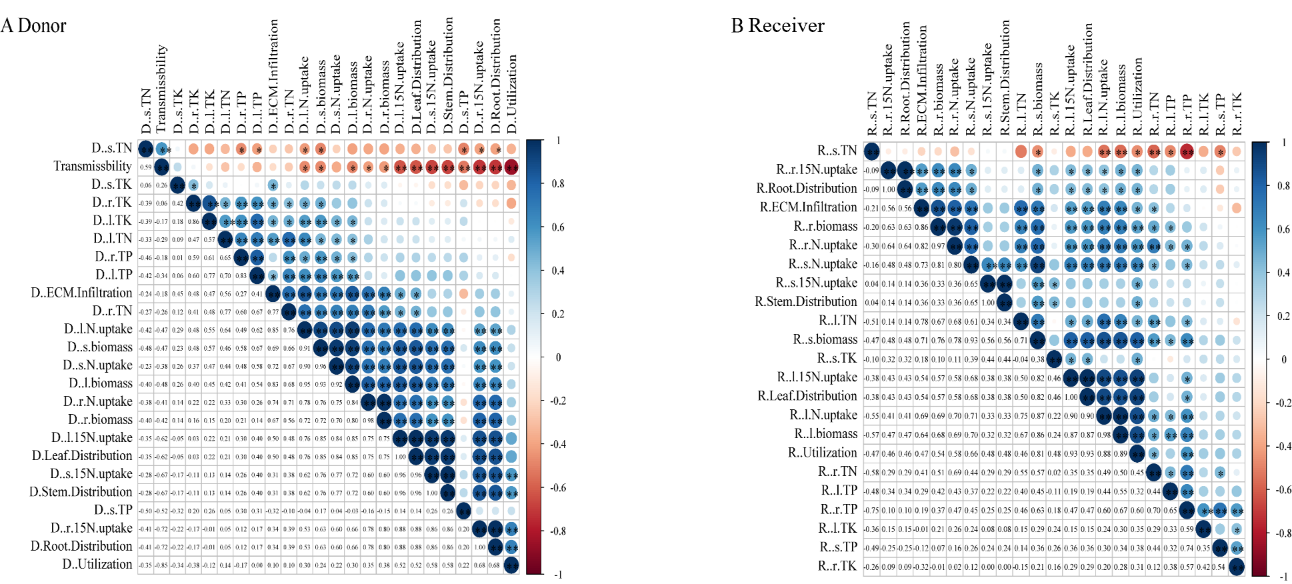


**Fig. S2** Correlation heatmaps of growth factors of donor (A) and receiver (B) plants, D: Donor plant; r: Root; s: Stem; l: Leaf; TN: Total Nitrogen; TP: Total phosphorus; TK: Total potassium; biomass: Biomass; ECM Infiltration: ectomycorrhizal colonization ratio; N acquired: Nitrogen absorption; Distribution: 15N allocation [%]; 15N acquired: 15N absorption; Use: The 15N use ratio; Transmissibility: The 15N transfer ratio; *: *P* < 0.05, **: *P* < 0.01.





Fig.S3 Effect of ectomycorrhizal fungi on the height of donor and receiver *P. massoniana* seedlings under different nitrogen levels

Note: N0、N2、N4、N6 were 0、2、4、6 g/L, respectively, nitrogen levels treatment; NE was not inoculated, Sm was inoculated; Different lowercase letters indicate significant differences among nitrogen treatments within each inoculation status, whereas different capital letters indicate significant differences between inoculation statuses within each nitrogen treatment (*P* < 0.05).
